# Supplementary material for: A burden of rare variants in BMPR2 and KCNK3 contributes to a risk of familial pulmonary arterial hypertension
Source: Springer Nature journal article supplement (doi:10.1186/s12890-017-0400-z), 2017-04-07
Supplement: MOESM1 [file 12208740]

Table S1. Summary of mapping statistics

| Family ID | SampleID | Disease status | Application  | Number of read |             | Number of bases |                 | Percent      |                             | Number of variants <sup>b</sup> |        |
|-----------|----------|----------------|--------------|----------------|-------------|-----------------|-----------------|--------------|-----------------------------|---------------------------------|--------|
|           |          |                |              | Total          | Mapped      | Total           | Mapped          | Mapped reads | Target covered <sup>a</sup> | SNVs                            | Indels |
| 1         | OM0054   | Proband        | Whole Exome  | 104,766,655    | 77,459,744  | 7,857,499,125   | 5,809,480,800   | 73.9         | 87.4                        | 36,692                          | 3,288  |
| 2         | OM0070   | Proband        | Whole Exome  | 61,430,098     | 46,182,581  | 4,607,257,350   | 3,463,693,575   | 75.2         | 75.3                        | 36,575                          | 2,869  |
| 2         | OM0071   | Affected       | Whole Exome  | 67,237,382     | 51,396,054  | 5,042,803,650   | 3,854,704,050   | 76.4         | 78.1                        | 36,503                          | 2,897  |
| 3         | OM0095   | Proband        | Whole Exome  | 86,583,264     | 66,575,106  | 6,493,744,800   | 4,993,132,950   | 76.9         | 83.4                        | 36,803                          | 3,110  |
| 4         | OF0001   | Unaffected     | Whole genome | 847,462,500    | 734,821,441 | 127,966,837,500 | 110,958,037,591 | 86.7         | 99.1                        | 37,421                          | 3,426  |
| 4         | OF0002   | Unaffected     | Whole genome | 885,665,298    | 788,335,262 | 133,735,459,998 | 119,038,624,562 | 89.0         | 99.5                        | 38,363                          | 3,542  |
| 4         | OF0003   | Unaffected     | Whole genome | 872,840,784    | 777,165,010 | 131,798,958,384 | 117,351,916,510 | 89.0         | 99.3                        | 38,201                          | 3,542  |
| 4         | OM0106   | Proband        | Whole genome | 826,178,940    | 748,033,875 | 124,753,019,940 | 112,953,115,125 | 90.5         | 99.5                        | 38,397                          | 3,526  |
| 5         | OM0079   | Proband        | Whole Exome  | 80,932,581     | 56,232,920  | 6,069,943,575   | 4,217,469,000   | 69.5         | 81.0                        | 36,276                          | 3,048  |
| 5         | OM0195   | Affected       | Whole Exome  | 77,597,032     | 53,761,375  | 5,819,777,400   | 4,032,103,125   | 69.3         | 77.9                        | 36,058                          | 2,813  |
| 6         | OM0104   | Proband        | Whole Exome  | 74,455,210     | 56,899,050  | 5,584,140,750   | 4,267,428,750   | 76.4         | 81.3                        | 37,315                          | 3,053  |
| 6         | OM0178   | Affected       | Whole Exome  | 60,606,131     | 42,458,335  | 4,545,459,825   | 3,184,375,125   | 70.1         | 72.5                        | 35,438                          | 2,733  |
| 7         | OM0065   | Proband        | Whole genome | 656,095,930    | 606,786,532 | 99,070,485,430  | 91,624,766,332  | 92.5         | 99.2                        | 38,590                          | 3,620  |
| 8         | OM0188   | Proband        | Whole genome | 821,829,322    | 765,808,847 | 124,096,227,622 | 115,637,135,897 | 93.2         | 99.6                        | 38,434                          | 3,479  |
| 9         | OM0250   | Proband        | Whole genome | 779,018,328    | 721,561,175 | 117,631,767,528 | 108,955,737,425 | 92.6         | 99.5                        | 38,625                          | 3,486  |
| 9         | OM0251   | Unaffected     | Whole genome | 752,035,468    | 692,702,678 | 113,557,355,668 | 104,598,104,378 | 92.1         | 99.1                        | 38,477                          | 3,440  |
| 9         | OM0252   | Unaffected     | Whole genome | 800,743,792    | 746,311,548 | 120,912,312,592 | 112,693,043,748 | 93.2         | 99.6                        | 38,309                          | 3,423  |

<sup>a</sup> Percent of total targeted bases covered at least 10x depths.

<sup>b</sup> Number and type of variants on coding regions.
