# Supplementary material for: A burden of rare variants in BMPR2 and KCNK3 contributes to a risk of familial pulmonary arterial hypertension
Source: Springer Nature journal article supplement (doi:10.1186/s12890-017-0400-z), 2017-04-07

Figure S2

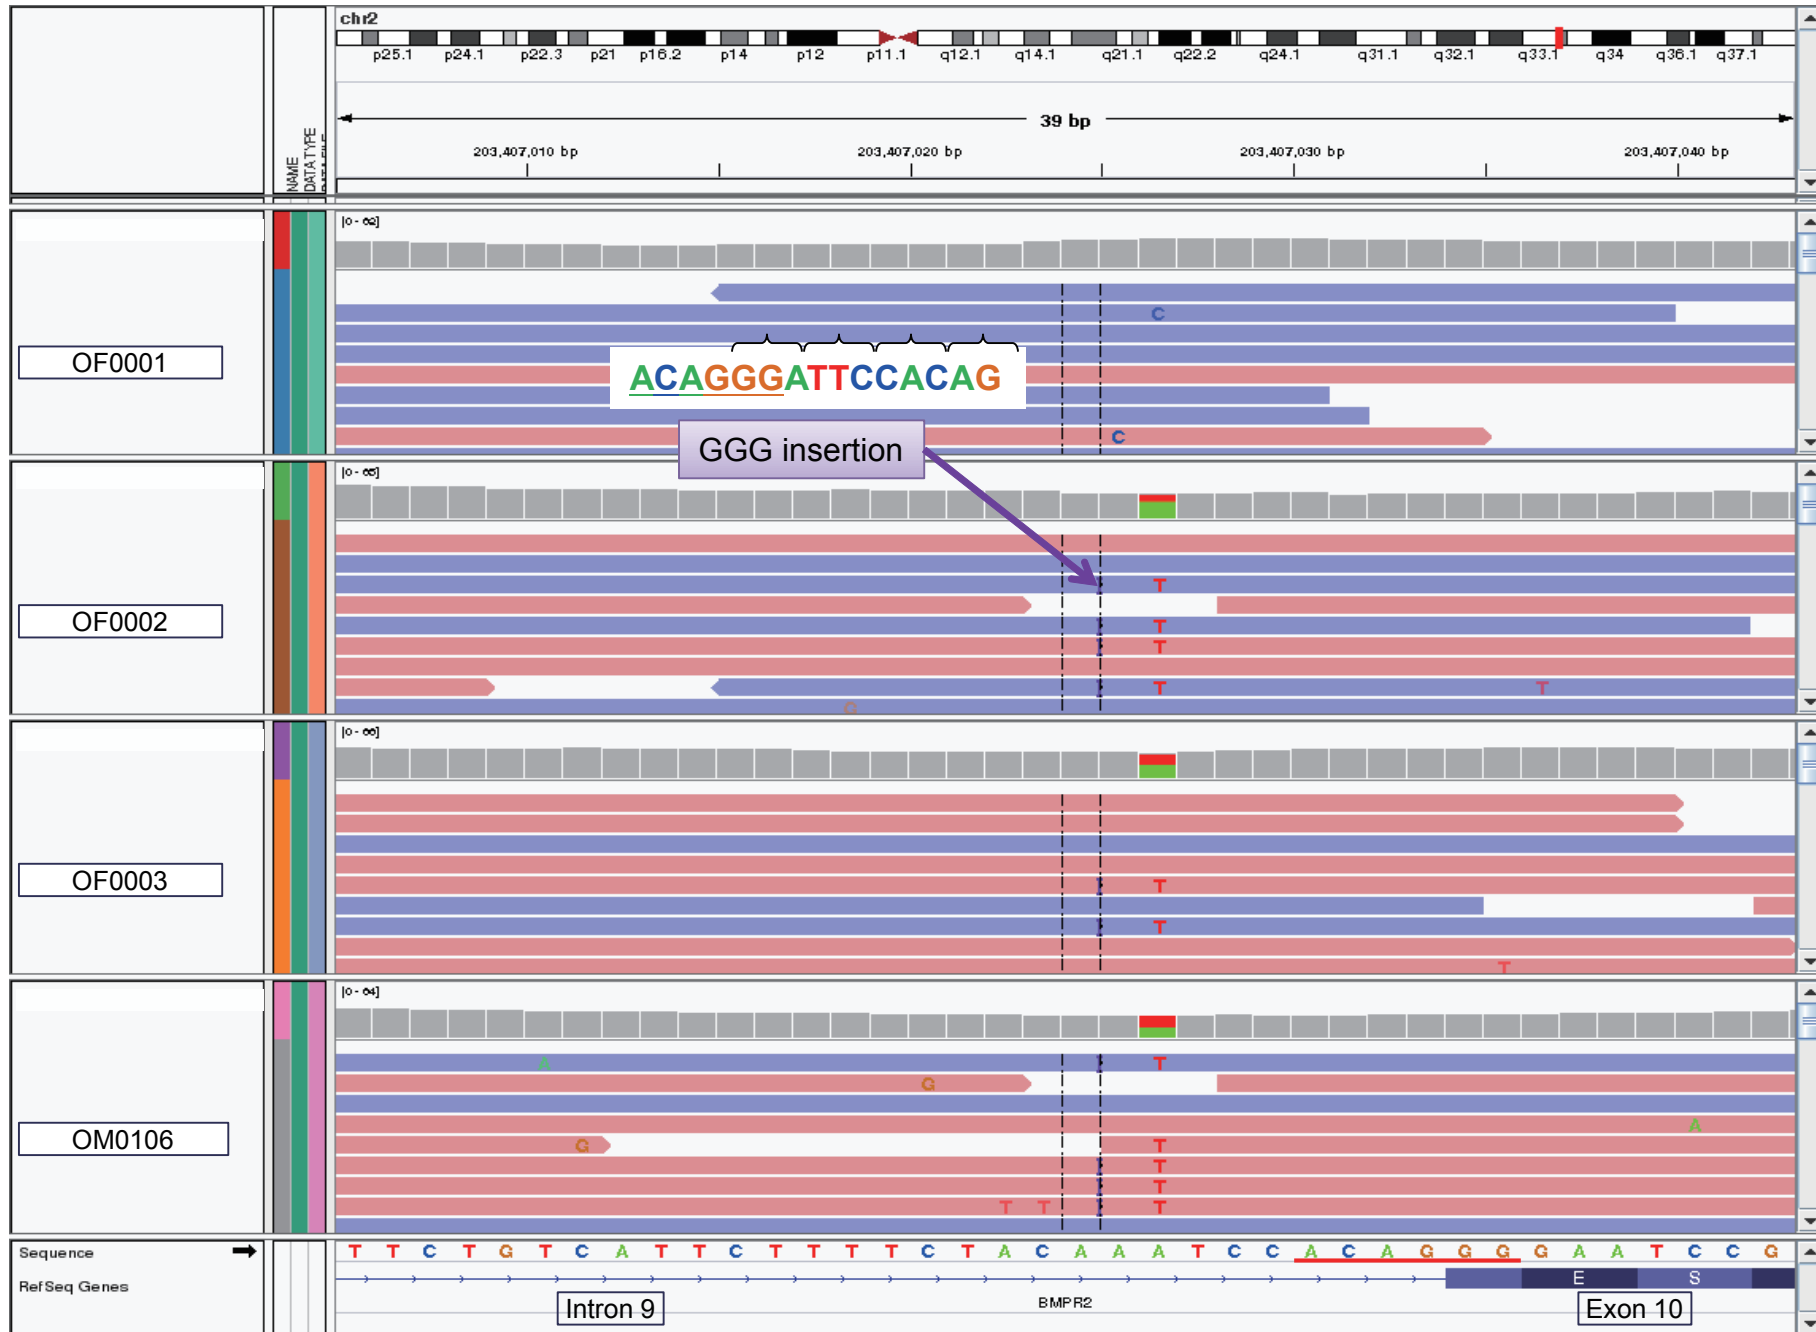

Supplement: MOESM3 [file 12208740]
